# Supplementary material for: Difference in Restricted Mean Survival Time for Cost-Effectiveness Analysis Using Individual Patient Data Meta-Analysis: Evidence from a Case Study
Source: PubMed Central journal article supplement (PMC4784740; doi:10.1371/journal.pone.0150032), 2016-03-09
Supplement: pone.0150032.s005.pdf [file pone.0150032.s005.pdf]

# S1 Supporting Information

## Methodological details

### Approach 1: Area between the two pooled survival curves

- **Stewart-Parmar:**

Stewart and Parmar methodology allows one to estimate the pooled survival curve for the experimental arm  $S_{Exp,pooled}(t)$  using the pooled hazard ratio (inverse variance weighted average) and the naive Kaplan-Meier survival curve in the control group  $S_{Control,KM}(t)$ . The pooled survival curve for the control arm  $S_{Control,pooled}(t)$  is simply set equal to  $S_{Control,KM}(t)$ :

$$S_{Control,pooled}(t) = S_{Control,KM}(t) \quad (S1)$$

$$S_{Exp,pooled}(t) = S_{Control,KM}(t)^{HR_{pooled}} \quad (S2)$$

- **Peto:**

In the Peto method, survival probabilities are estimated at predetermined time intervals  $i$  (actuarial method) based on survival probability  $p_i$  of the whole population and a pooled hazard ratio  $HR_{pooled,i}$  which can vary between time periods.

$$p_i = \exp\left(-\frac{D_i}{PP_i}\right) \quad (S3)$$

Where  $D_i$  is the number of deaths during period  $i$  and  $PP_i$  the total number of person-periods at period  $i$ . One person-period is equivalent to one person-year when the time interval chosen is one year.

$$\ln(HR_{pooled,i}) = \frac{\sum_{j=1}^N \frac{\ln(HR_{i,j})}{Var[\ln(HR_{i,j})]}}{\sum_{j=1}^N \frac{1}{Var[\ln(HR_{i,j})]}} \quad (S4)$$

Where  $HR_{i,j}$  are the hazard ratios estimated at time  $i$  in trial  $j$  through the use of the log-rank observed minus expected number of deaths and its variance.

Survival probabilities at each period  $i$  in the control arm ( $p_{Control,i}$ ) and in the experimental arm ( $p_{Exp,i}$ ) are estimated as follow:

$$p_{Control,i} = p_i - \left[0,5 \times p_i \times (p_i - 1) \times \ln(HR_{pooled,i})\right] \quad (S5)$$

$$p_{Exp,i} = p_i + \left[0,5 \times p_i \times (p_i - 1) \times \ln(HR_{pooled,i})\right] \quad (S6)$$

The survival probability at time  $t$  in each arm is the product of the probabilities across

$$\text{periods: } S_{\text{Controlpooled}}(t) = \prod_{i=1}^{n_i} p_{\text{Control}i} \quad \text{and} \quad S_{\text{Exp,pooled}}(t) = \prod_{i=1}^{n_i} p_{\text{Exp}i} \quad (\text{S7})$$

## Approach 2: Pooling differences in restricted mean survival time

The method to estimate the overall difference in restricted mean survival time (rmstD) aggregating the  $\text{rmstD}_j$  estimated in each of the  $N$  trials is developed below with a fixed-effect model:

$$\text{rmstD} = \frac{\sum_{j=1}^N \frac{\text{rmstD}_j}{\text{Var}(\text{rmstD}_j)}}{\sum_{j=1}^N \frac{1}{\text{Var}(\text{rmstD}_j)}} \quad \text{and} \quad \text{Var}[\text{rmstD}] = \left[ \sum_{j=1}^N \frac{1}{\text{Var}[\text{rmstD}_j]} \right]^{-1} \quad (\text{S8})$$

With difference in restricted mean survival time in each trial:

$$\text{rmstD}_j = \int_0^{t^*} S_{\text{Exp},j}(t) \cdot dt - \int_0^{t^*} S_{\text{Control},j}(t) \cdot dt = \hat{\mu}_{\text{Exp},t^*,j} - \hat{\mu}_{\text{Control},t^*,j} \quad (\text{S9})$$

$\hat{\mu}_{\text{Exp},t^*,j}$  and  $\hat{\mu}_{\text{Control},t^*,j}$  are the restricted mean survival times estimated in trial  $j$ , respectively for the experimental (Exp) and for the control arm.

$\text{Var}[\text{rmstD}_j]$  in each trial  $j$  can be estimated based on the following formula (Karrison T. *Control Clin Trials* 1997;18:151-67):

$$\text{rmstD}_j = \hat{\mu}_{\text{Exp},t^*,j} - \hat{\mu}_{\text{Control},t^*,j} \quad \rightarrow \quad \text{Var}[\text{rmstD}_j] = \text{Var}[\hat{\mu}_{\text{Exp},t^*,j}] + \text{Var}[\hat{\mu}_{\text{Control},t^*,j}] \quad (\text{S10})$$

Where the variances of mean survival time are estimated (Klein JP, Moeschberger ML. 1997. *Survival Analysis: techniques for censored and truncated data*, 1st ed. New York: Springer-Verlag):

$$\text{Var}[\hat{\mu}_{\text{arm},T,j}] = \sum_{i=1}^{D_j} \left[ \int_{t_{i,j}}^{t^*} S_{\text{arm},j}(t) \cdot dt \right]^2 \frac{d_{i,j}}{Y_{i,j}(Y_{i,j} - d_{i,j})} \quad \text{where arm} = \text{Exp or Control} \quad (\text{S11})$$

In each trial  $j$ :  $D_j$  is the number of distinct event times ( $t_{1,j} < t_{2,j} < \dots < t_{D,j}$ ),  $Y_{i,j}$  is the number of individuals who are at risk at time  $t_{i,j}$  and  $d_{i,j}$  is the number of events at time  $t_{i,j}$ .

To calculate the overall rmstD (equation (S8)),  $S_{\text{arm},j}(t)$  has then to be replaced by its estimator depending on the survival analysis method chosen (Kaplan-Meier and exponential in our empirical application) in the equations (S9) and (S11)

- **Pooled Kaplan-Meier:**

Replacing  $S_{arm,j}(t)$  by the Kaplan-Meier estimator  $\hat{S}_{arm,j}(t)$ , it leads to:

$$rmstD_j = \hat{\mu}_{Exp,t^*,j} - \hat{\mu}_{Control,t^*,j} = \sum_{i=1}^{D_j} \hat{S}_{Exp,j}(t_{i,j}) \times (t_{i+1,j} - t_{i,j}) - \sum_{i=1}^{D_j} \hat{S}_{Control,j}(t_{i,j}) \times (t_{i+1,j} - t_{i,j}) \quad (S9-bis)$$

$$Var[\hat{\mu}_{arm,T,j}] = \frac{m_j}{m_j - 1} \sum_{i=1}^{D_j-1} \frac{a_{i,j}^2}{Y_{i,j}(Y_{i,j} - d_{i,j})} \quad (S11-bis)$$

where  $a_{i,j} = \sum_{l=i}^{D_j-1} \hat{S}_{arm,j}(t_{l,j}) \times (t_{l+1,j} - t_{l,j})$  and  $m_j = \sum_{l=1}^{D_j} d_{l,j}$

- **Pooled Exponential**

Replacing  $S_{arm,j}(t)$  by the exponential estimator  $\hat{S}_{arm,j}(t) = e^{-\lambda_{arm,j} \cdot t}$ , it leads to:

$$rmstD_j = \int_0^{t^*} e^{-\lambda_{Exp,j} \cdot t} \cdot dt - \int_0^{t^*} e^{-\lambda_{Control,j} \cdot t} \cdot dt = \frac{1 - e^{-\lambda_{Exp,j} \cdot t^*}}{\lambda_{Exp,j}} - \frac{1 - e^{-\lambda_{Control,j} \cdot t^*}}{\lambda_{Control,j}} \quad (S9-ter)$$

$$\text{and } Var[\hat{\mu}_{arm,T,j}] = \sum_{i=1}^D \left[ \frac{e^{-\lambda_{arm,j} \cdot t_i} - e^{-\lambda_{arm,j} \cdot t^*}}{\lambda_{arm,j}} \right]^2 \frac{d_{i,j}}{Y_{i,j}(Y_{i,j} - d_{i,j})} \quad (S11-ter)$$
