# Supplementary material for: Difference in Restricted Mean Survival Time for Cost-Effectiveness Analysis Using Individual Patient Data Meta-Analysis: Evidence from a Case Study
Source: PubMed Central journal article supplement (PMC4784740; doi:10.1371/journal.pone.0150032), 2016-03-09
Supplement: pone.0150032.s006.pdf [file pone.0150032.s006.pdf]

| <b>Trials*</b> | <b>Number of patients randomized</b> | <b>HR [95% CI]</b>      |
|----------------|--------------------------------------|-------------------------|
| PMCI 88C091    | 101                                  | 0.97 [0.65-1.44]        |
| PMCI 88C091 CT | 107                                  | 1.26 [0.86-1.86]        |
| CHART          | 563                                  | 0.78 [0.66-0.94]        |
| ECOG 2597      | 119                                  | 0.75 [0.51-1.10]        |
| CHARTWEL       | 300                                  | 1.00 [0.79-1.28]        |
| CHARTWEL CT    | 106                                  | 0.74 [0.48-1.13]        |
| Gliwice 2001   | 58                                   | 0.90 [0.52-1.54]        |
| NCCTG 902451   | 74                                   | 0.64 [0.39-1.05]        |
| NCCTG 942452   | 246                                  | 0.95 [0.73-1.24]        |
| RTOG 8808      | 326                                  | 0.92 [0.74-1.15]        |
| <b>Overall</b> | <b>2000</b>                          | <b>0.88 [0.80-0.97]</b> |

**S1 Table. List of trials included in the Meta-Analysis of Radiotherapy in Lung Cancer**

CHART: Continuous Hyperfractionated Accelerated Radiation Therapy; CHARTWEL: CHART Week-End Less; CI: confidence interval; CT: chemotherapy; ECOG: Eastern Cooperative Oncology Group; HR: Hazard ratio for Modified RT versus Conventional RT; MAR-LC: Meta-Analysis of Radiotherapy in Lung Cancer; NCCTG: North Central Cancer Treatment Group; PCMI: Peter MacCallum Institute; RTOG: Radiation Therapy Oncology Group; RT: Radiotherapy; \*: see reference [19] for further details and for the trials references
